# Supplementary material for: Antibiotic prophylaxis before tissue biopsy has no effect on culture results in presumed aseptic revision total hip arthroplasty
Source: Copernicus journal article supplement (doi:10.5194/jbji-9-67-2024), 2024-02-15
Supplement: Supplementary file [file jbji-9-67-2024-supplement.pdf]

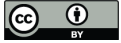

*Supplement of*

## **Antibiotic prophylaxis before tissue biopsy has no effect on culture results in presumed aseptic revision total hip arthroplasty**

**Jesse D. De Groot et al.**

*Correspondence to:* Jesse D. De Groot ([jd.de.groot@outlook.com](mailto:jd.de.groot@outlook.com))

The copyright of individual parts of the supplement might differ from the article licence.

## SUPPLEMENTARY MATERIAL

| Positive culture result rate:<br>n patient(s) (%) | AP pre-incision<br>(n=61) | AP post-biopsy<br>(n=429) | p-value |
|---------------------------------------------------|---------------------------|---------------------------|---------|
| BMI                                               |                           |                           | 0.83    |
| <30                                               | 2 / 38 (5.3)              | 16 / 312 (5.1)            |         |
| ≥30                                               | 1 / 20 (5.0)              | 7 / 94 (7.4)              |         |
| ASA                                               |                           |                           | 0.98    |
| I/II                                              | 3 / 48 (6.3)              | 13 / 303 (4.3)            |         |
| III/IV                                            | 0 / 10 (0)                | 10 / 103 (9.7)            |         |

**Table S1:** Overview of the total culture positive rate (at least two positive intraoperative cultures of a specific microorganism or multiple colonies of a single high virulent microorganism in a single positive intraoperative culture) stratified by BMI ( $\geq 30$  or  $< 30$ ) and ASA (I/II or III/IV) of the study arm receiving AP pre-incision versus the study arm receiving AP after tissue biopsy. Cochran-Manzel-Haenszel tests were applied on the stratified data and statistical differences are displayed accordingly. Abbreviations: AP, antibiotic prophylaxis.

| Contaminated culture result rate:<br>n patient(s) (%) | AP pre-incision<br>(n=61) | AP post-biopsy<br>(n=429) | p-value |
|-------------------------------------------------------|---------------------------|---------------------------|---------|
| <b>BMI</b>                                            |                           |                           | 0.94    |
| <30                                                   | 13 / 27 (48.1)            | 75 / 254 (29.5)           |         |
| ≥30                                                   | 1 / 20 (5.0)              | 20 / 80 (25.0)            |         |
| <b>ASA</b>                                            |                           |                           | 0.93    |
| I/II                                                  | 11 / 40 (27.5)            | 72 / 244 (29.5)           |         |
| III/IV                                                | 3 / 7 (42.9)              | 24 / 89 (27.0)            |         |

**Table S2:** Overview of the total contamination rate (one positive intraoperative culture of a single low virulent microorganism) stratified by BMI ( $\geq 30$  or  $< 30$ ) and ASA (I/II or III/IV) of the study arm receiving AP pre-incision versus the study arm receiving AP after tissue biopsy. Cochran-Manzel-Haenszel tests were applied on the stratified data and statistical differences are displayed accordingly. Abbreviations: AP, antibiotic prophylaxis.
